# Supplementary material for: Genome-Wide Patterns of Genetic Polymorphism and Signatures of Selection in Plasmodium vivax
Source: PubMed Central journal article supplement (PMC4316620; doi:10.1093/gbe/evu267), 2014-12-17

**Supplementary Figure S3. Null distributions for each regression coefficients**

corresponding to each of the 10 knots of the B-spline design, as well as the observed fitted coefficient (black vertical lines) for each one of the 14 chromosomes in *Plasmodium vivax*. We consider significant only those observed fitted values that are above or below 99% of the regression coefficients from the bootstrapped pseudo-random samples.

# chromosome 1 bootstrap test

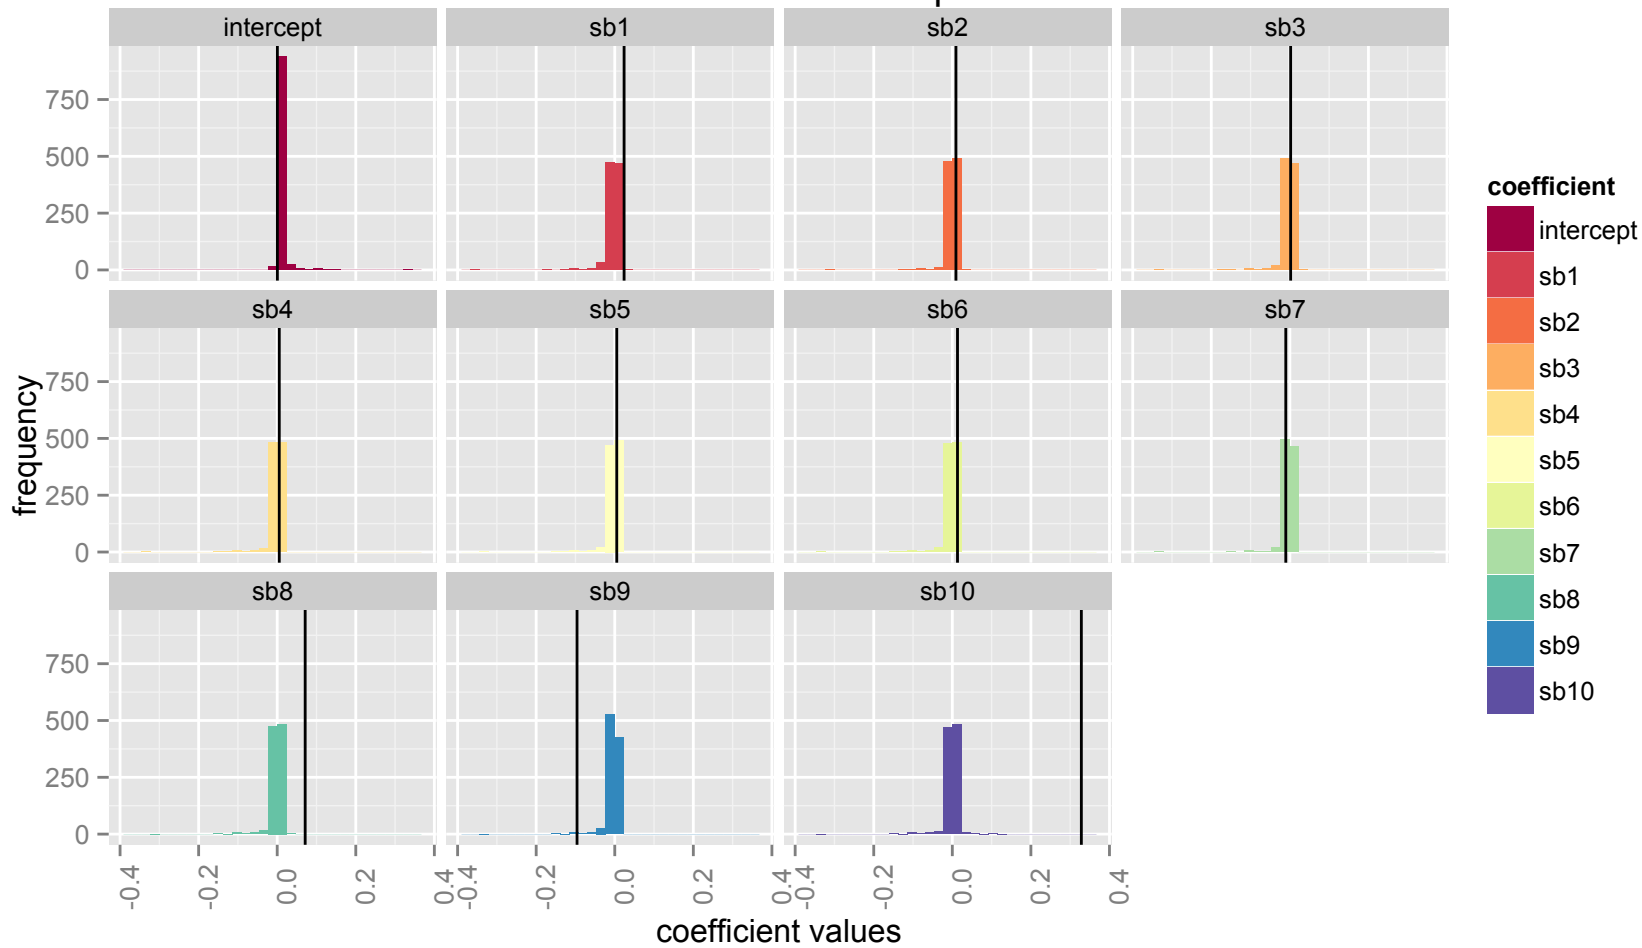

# chromosome 2 bootstrap test

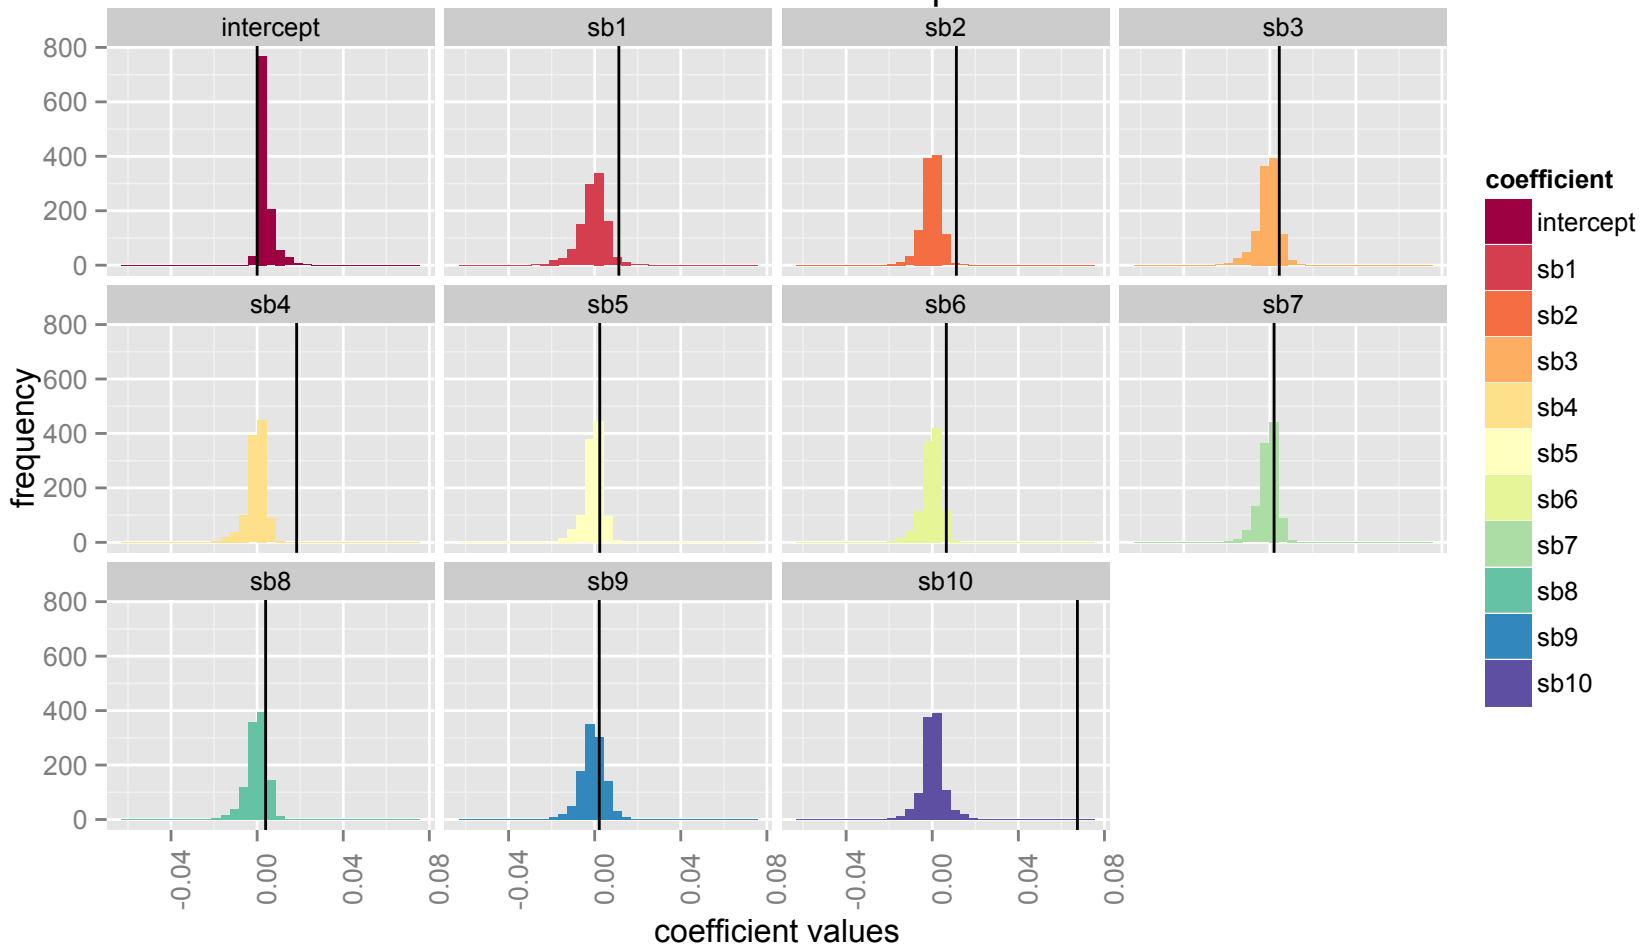

# chromosome 3 bootstrap test

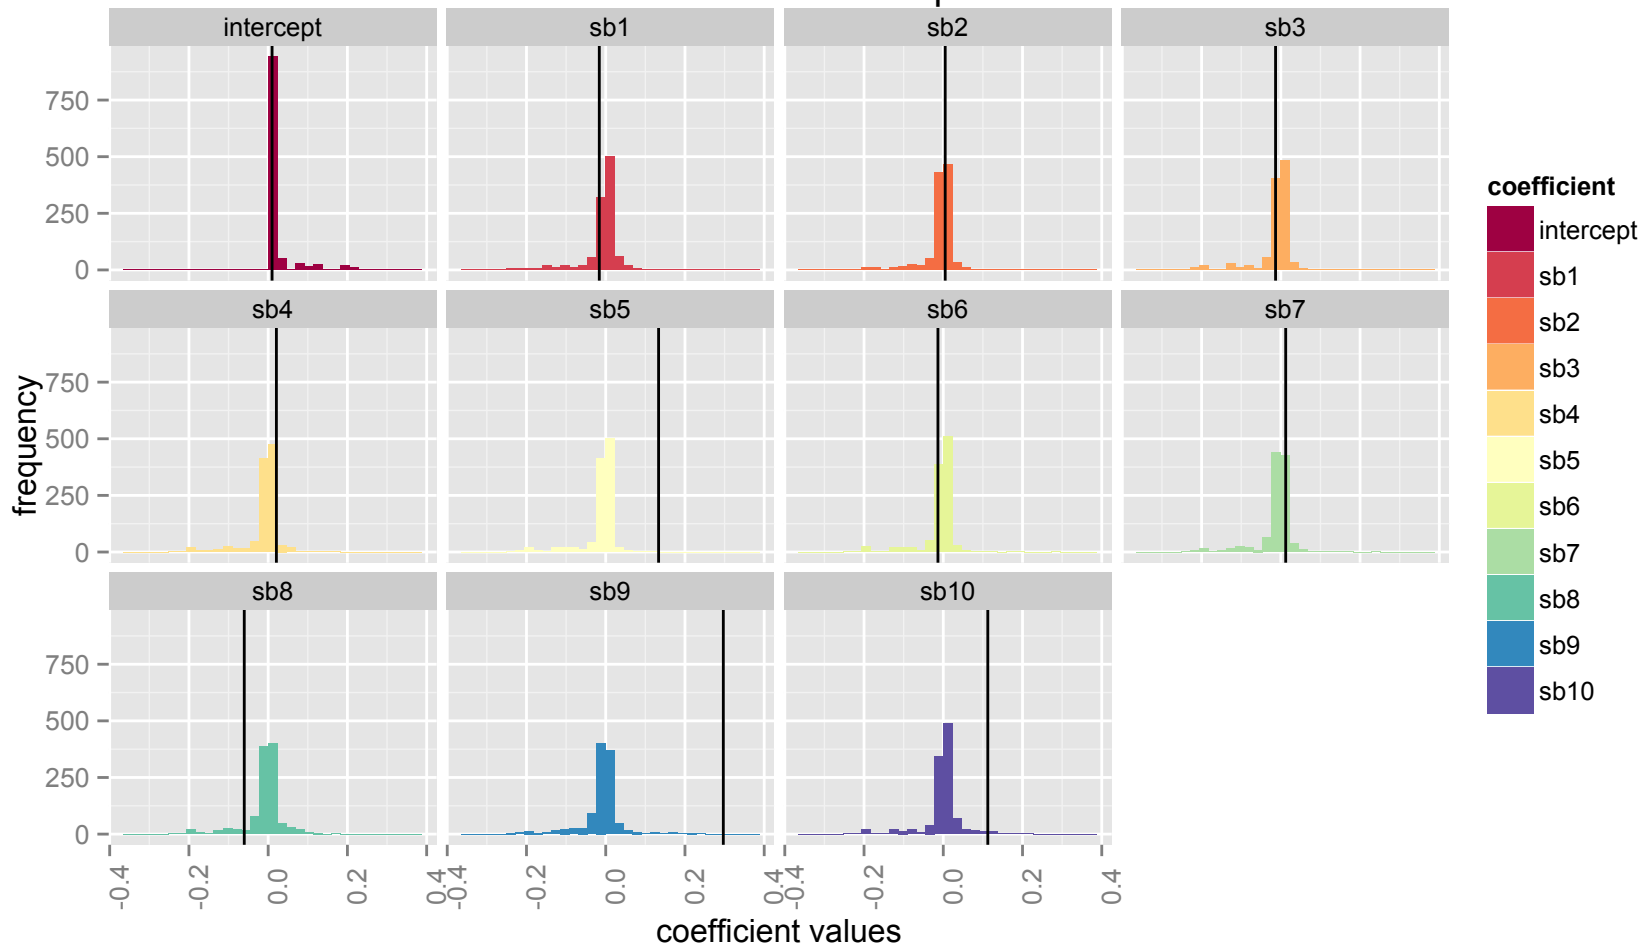

# chromosome 4 bootstrap test

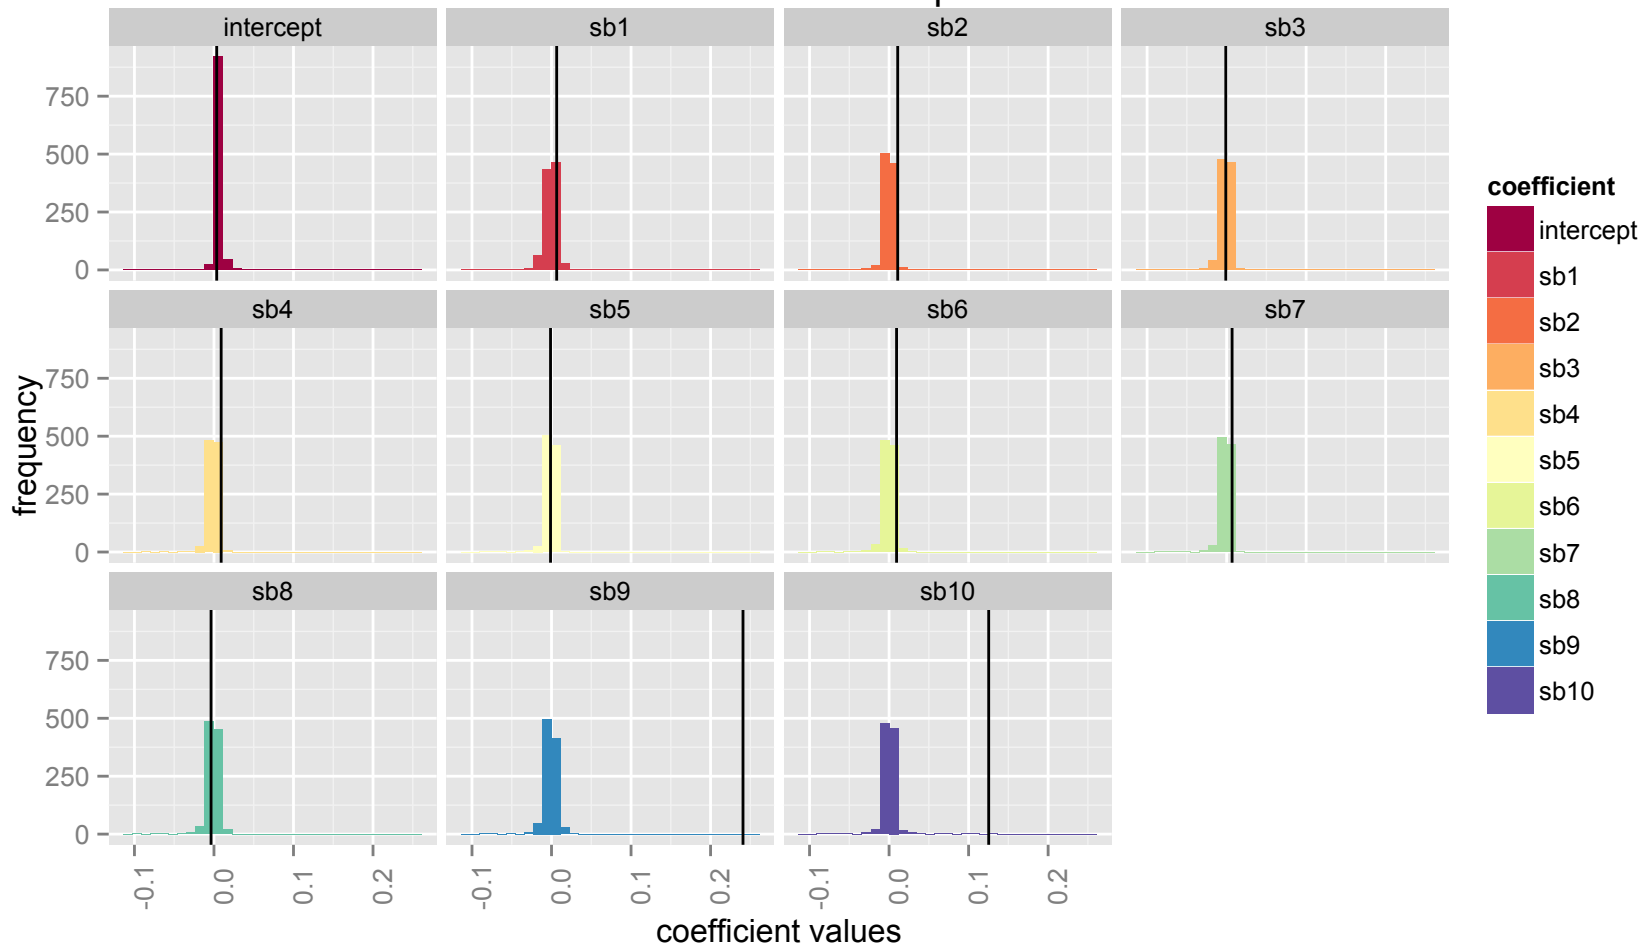

# chromosome 5 bootstrap test

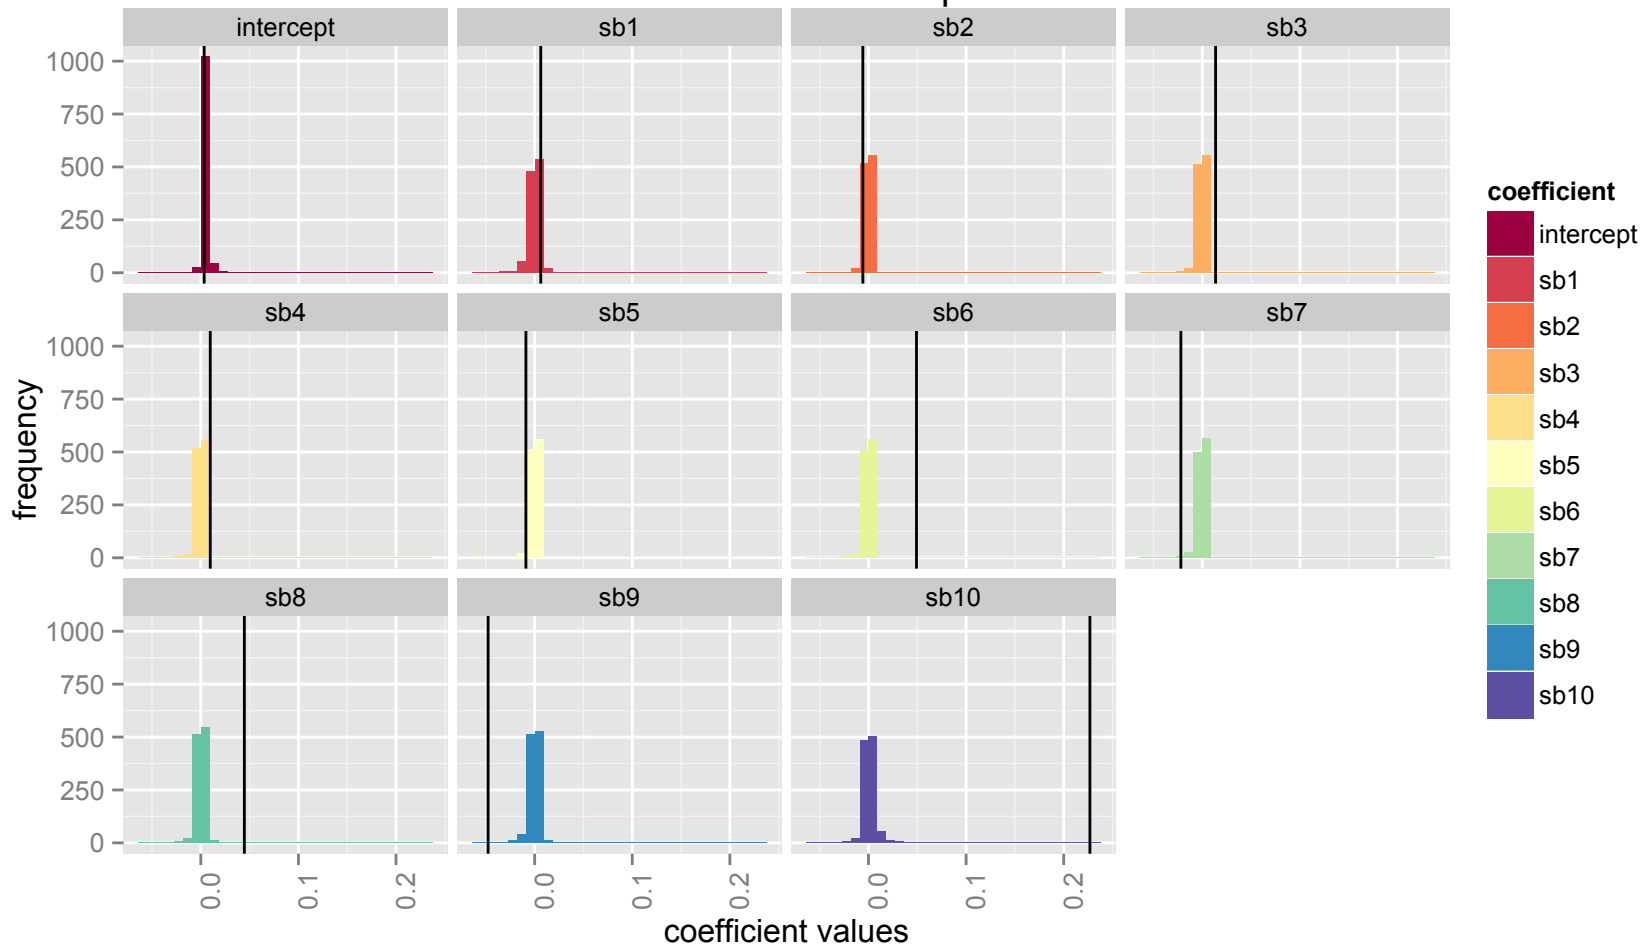

# chromosome 6 bootstrap test

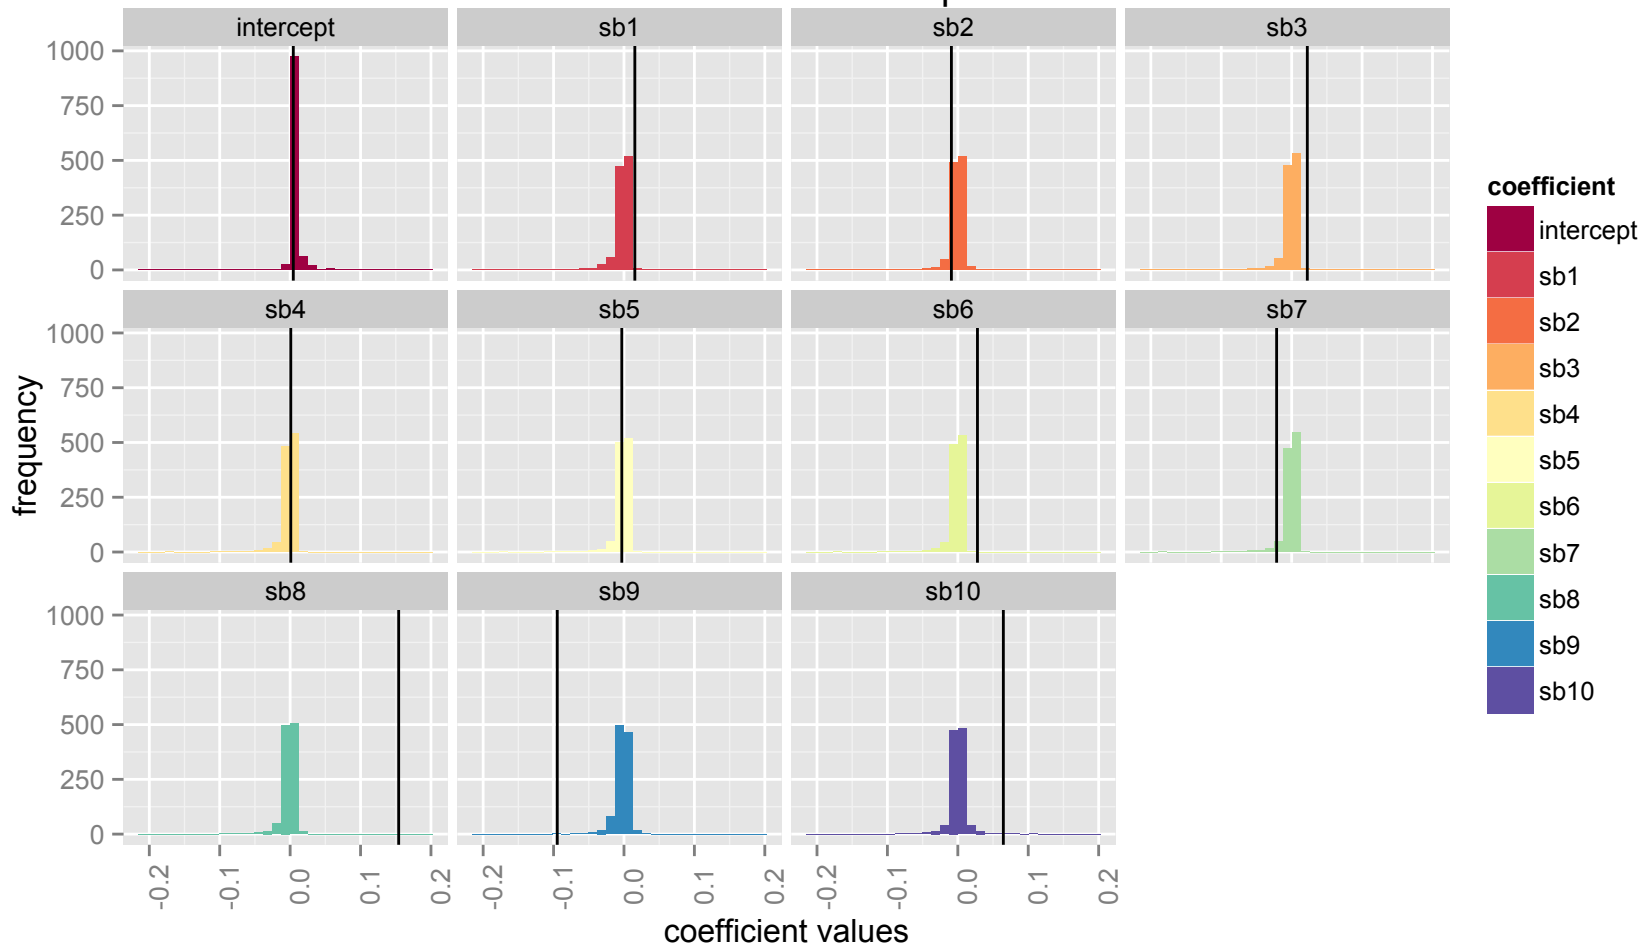

# chromosome 7 bootstrap test

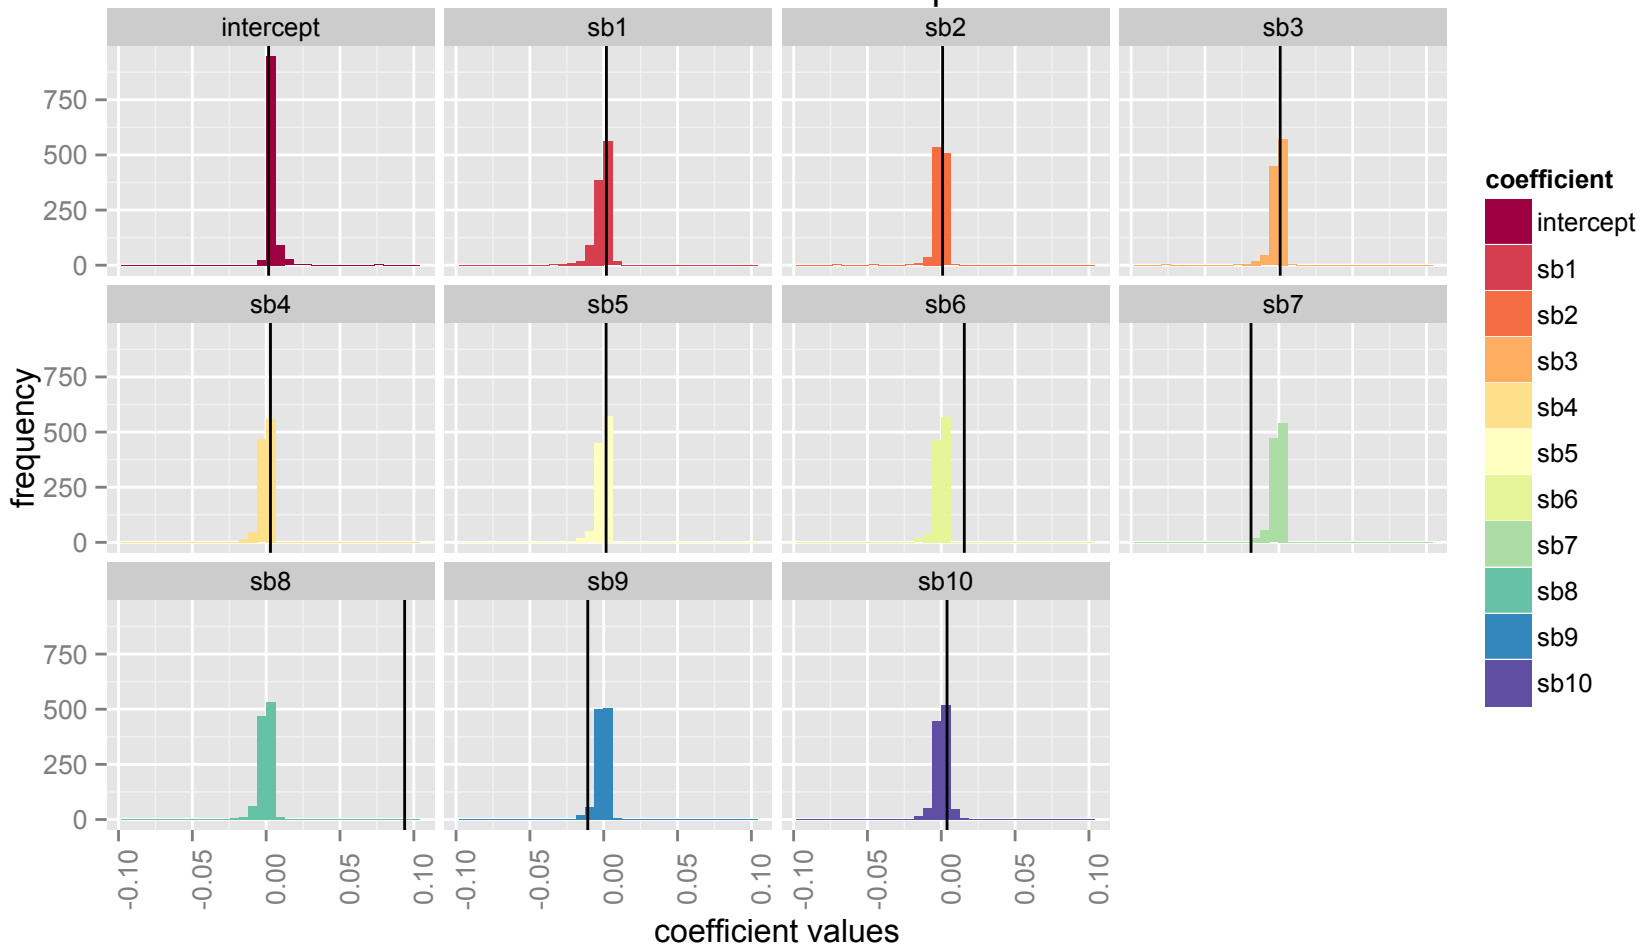



# chromosome 8 bootstrap test

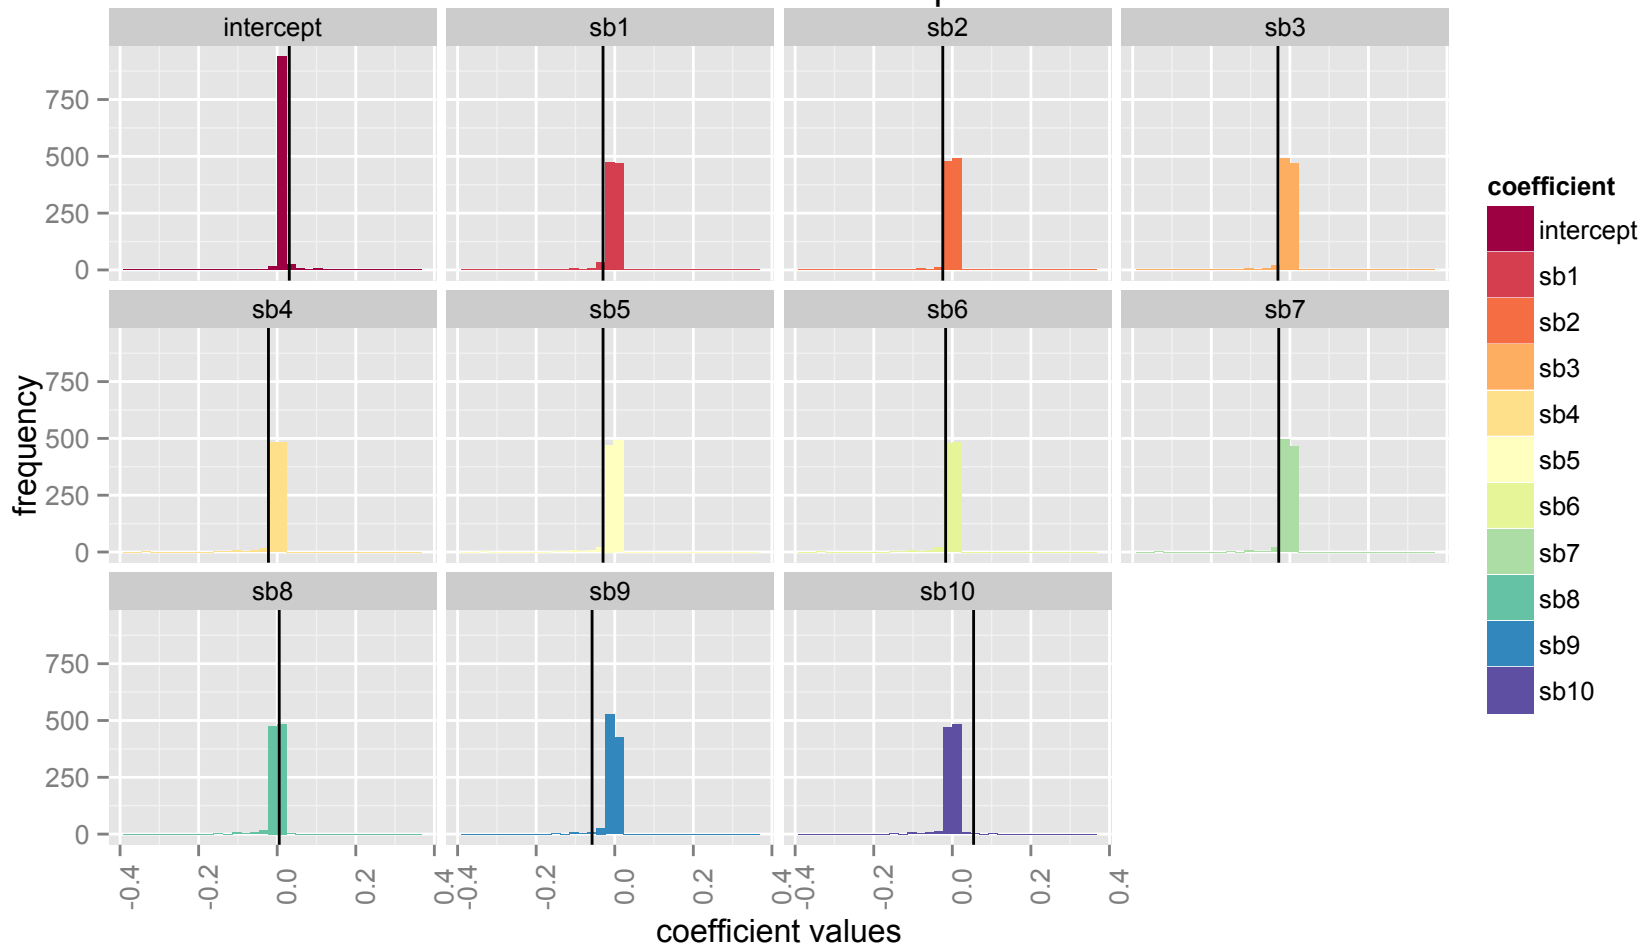

# chromosome 9 bootstrap test

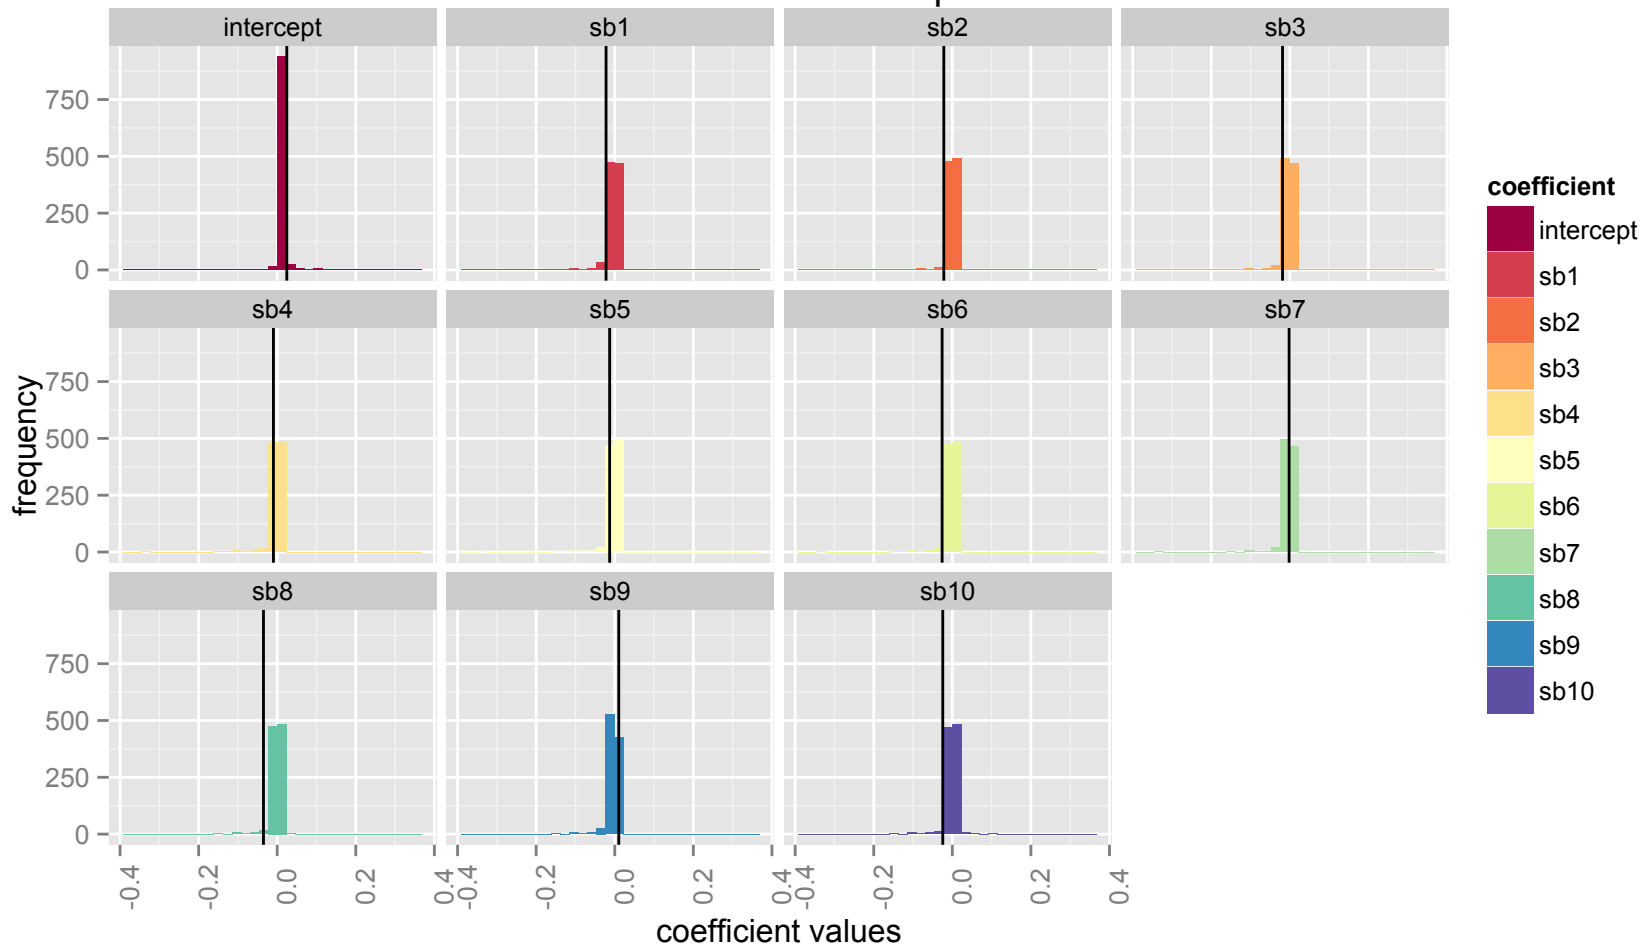

# chromosome 10 bootstrap test

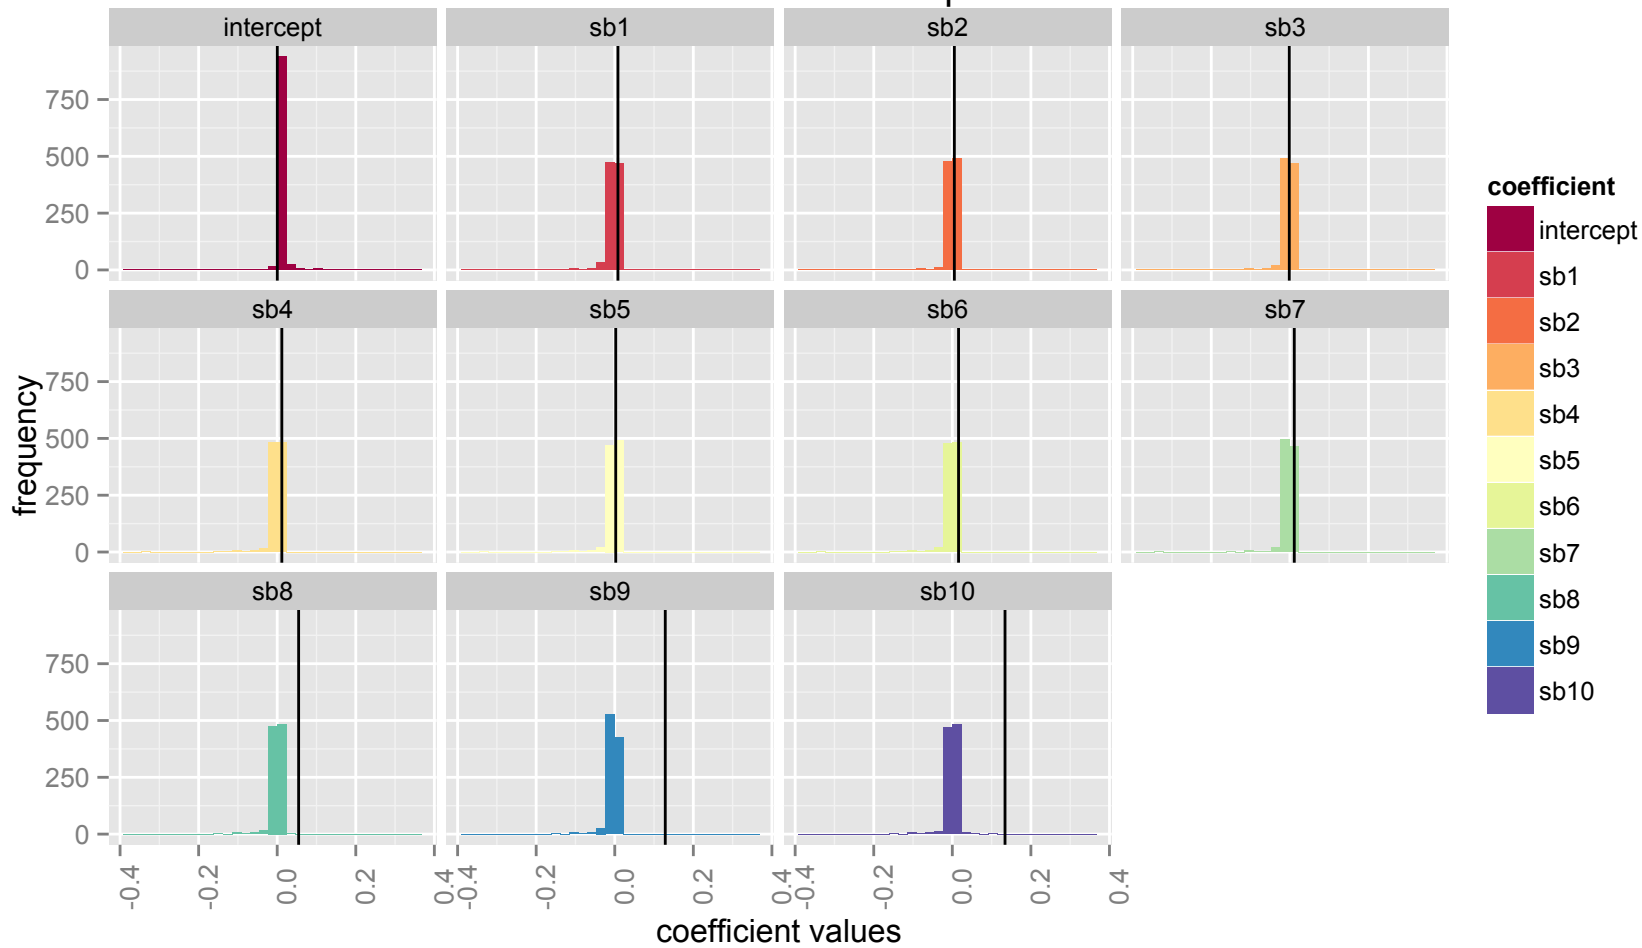

# chromosome 11 bootstrap test

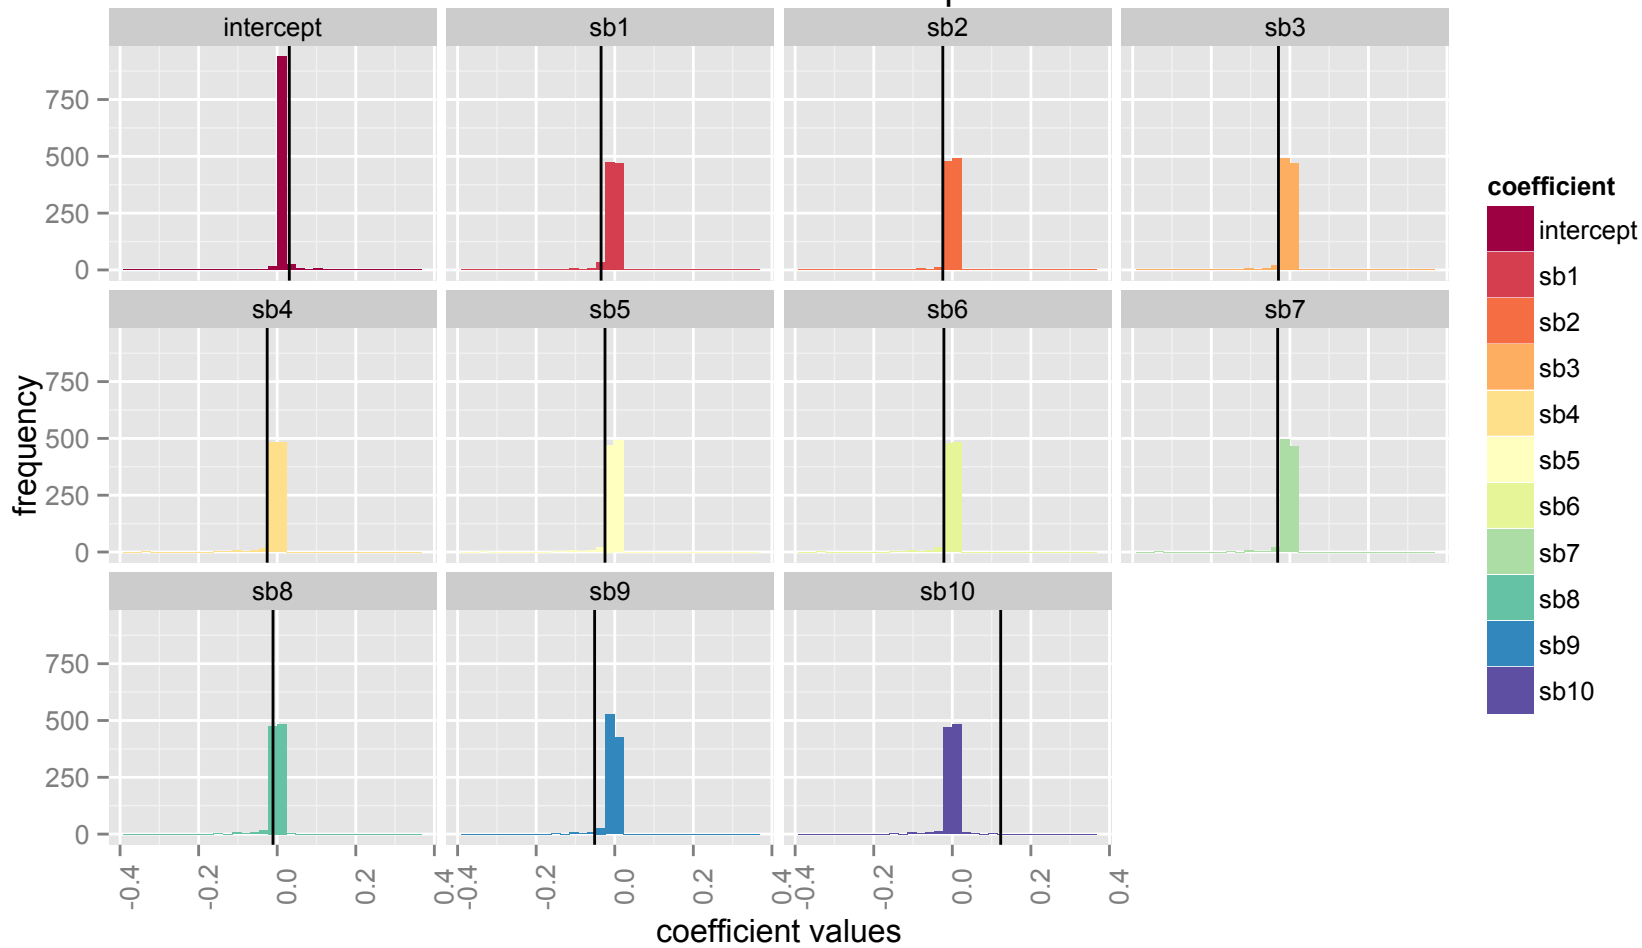

# chromosome 12 bootstrap test

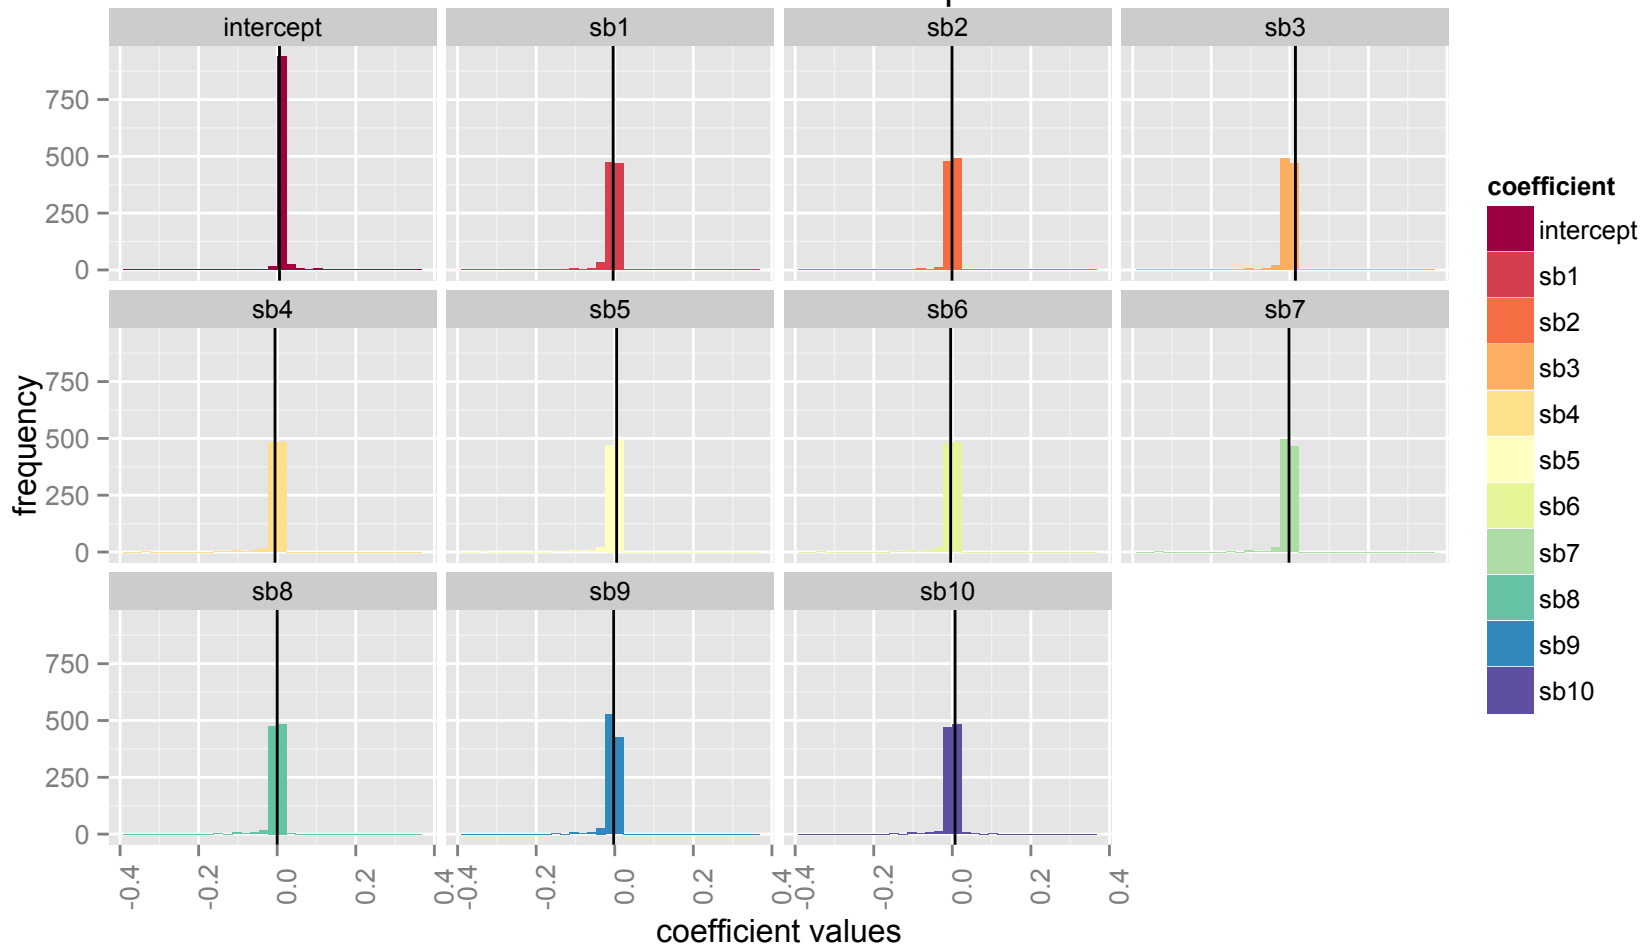

# chromosome 13 bootstrap test

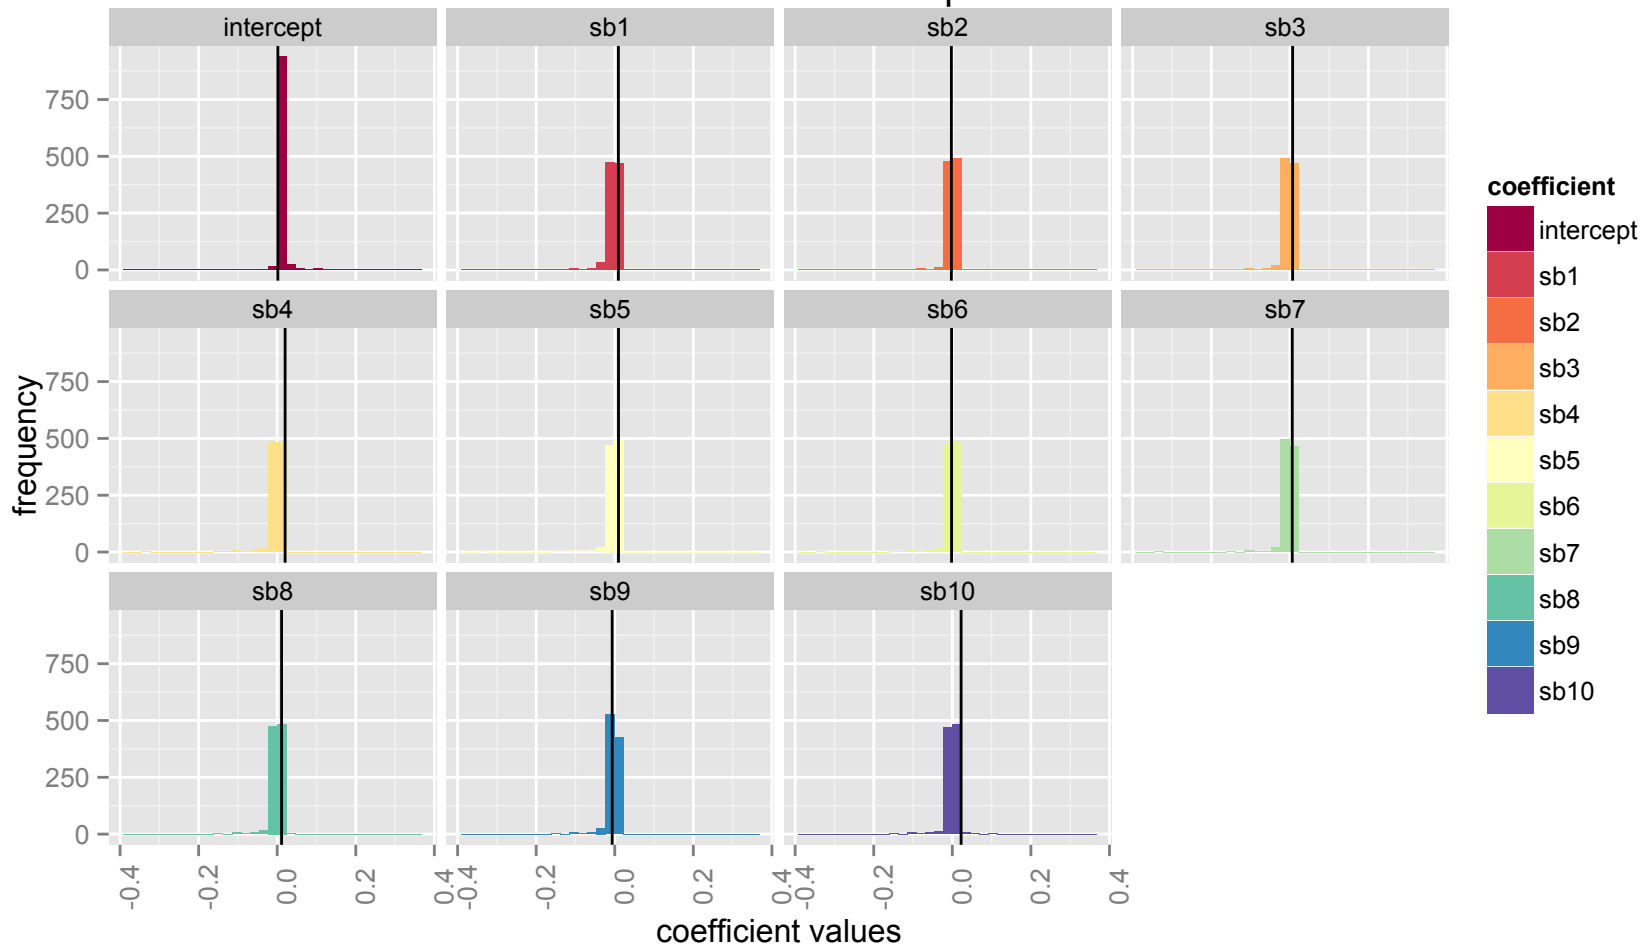

# chromosome 14 bootstrap test

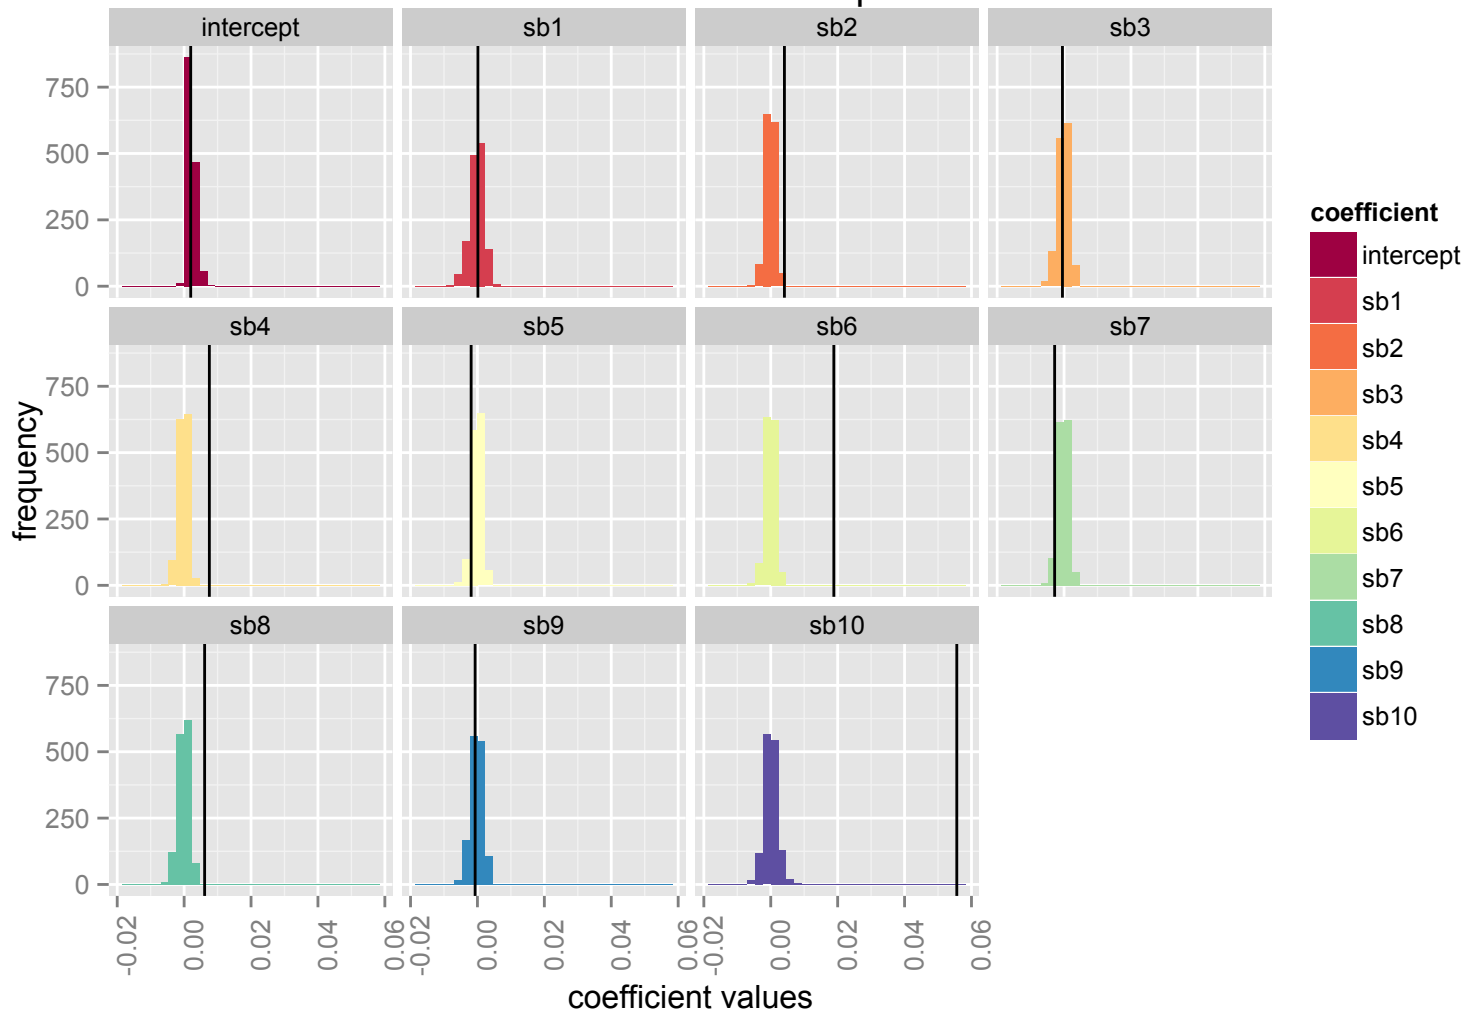

Supplement: supp_evu267_Figures_S3.pdf [file supp_evu267_Figures_S3.pdf]
