# Supplementary material for: Genome-Wide Patterns of Genetic Polymorphism and Signatures of Selection in Plasmodium vivax
Source: PubMed Central journal article supplement (PMC4316620; doi:10.1093/gbe/evu267), 2014-12-17

mean  $\pi$  (mutations/site)

0.00 0.10 0.20

a

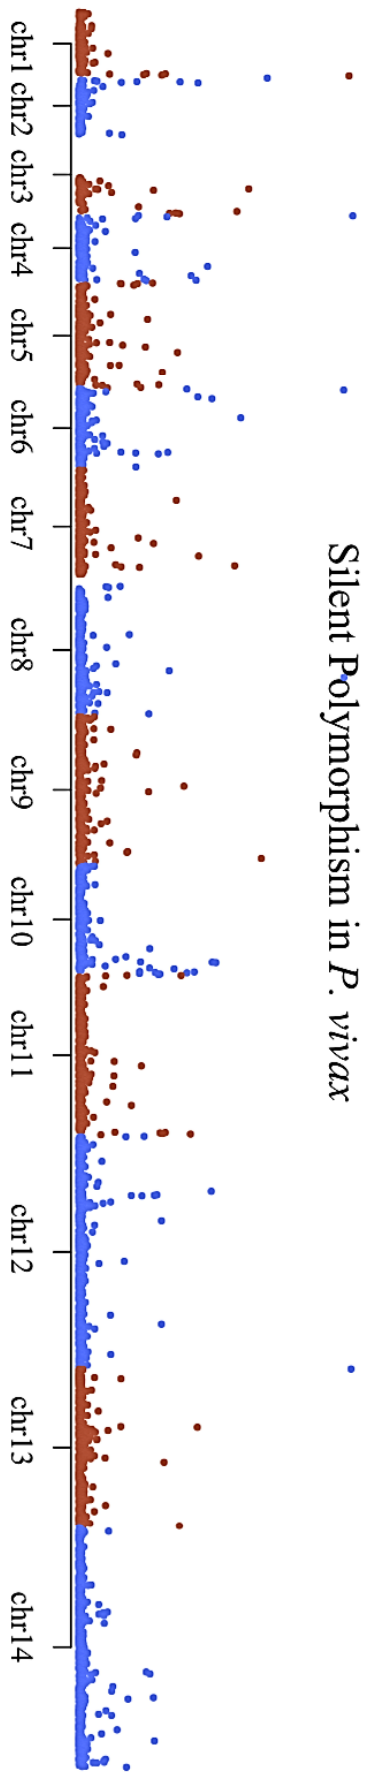

b

mean  $k$  (substitutions/site)

0.0 0.5 1.0 1.5

Silent Divergence between *P. vivax* and *P. cynomolgi*

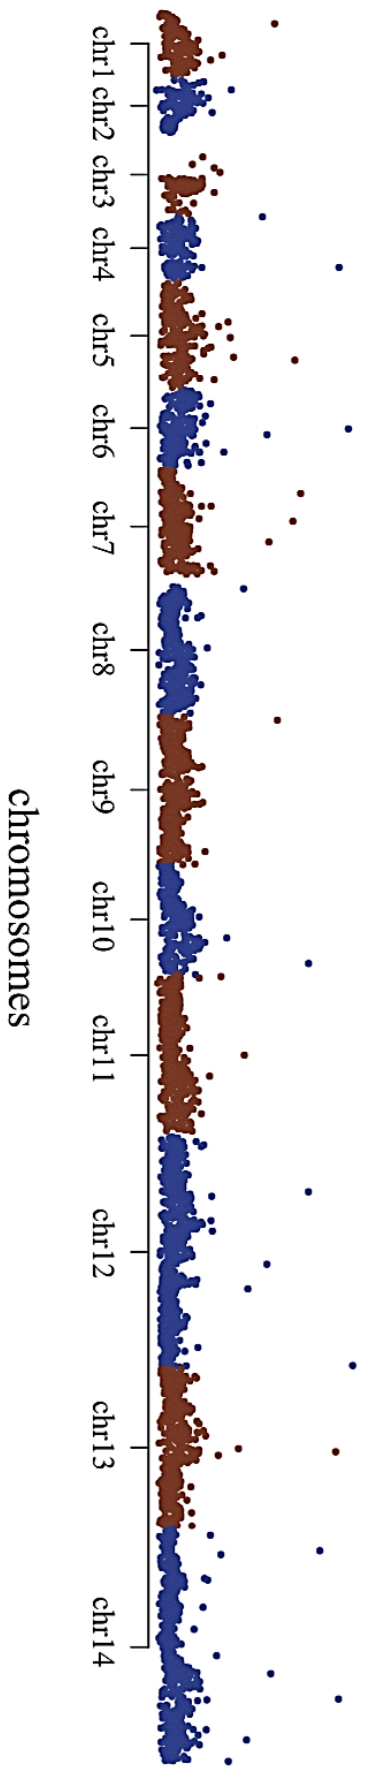

Supplement: supp_evu267_Figure_S2.pdf [file supp_evu267_Figure_S2.pdf]
