# Supplementary material for: Genome-Wide Patterns of Genetic Polymorphism and Signatures of Selection in Plasmodium vivax
Source: PubMed Central journal article supplement (PMC4316620; doi:10.1093/gbe/evu267), 2014-12-17

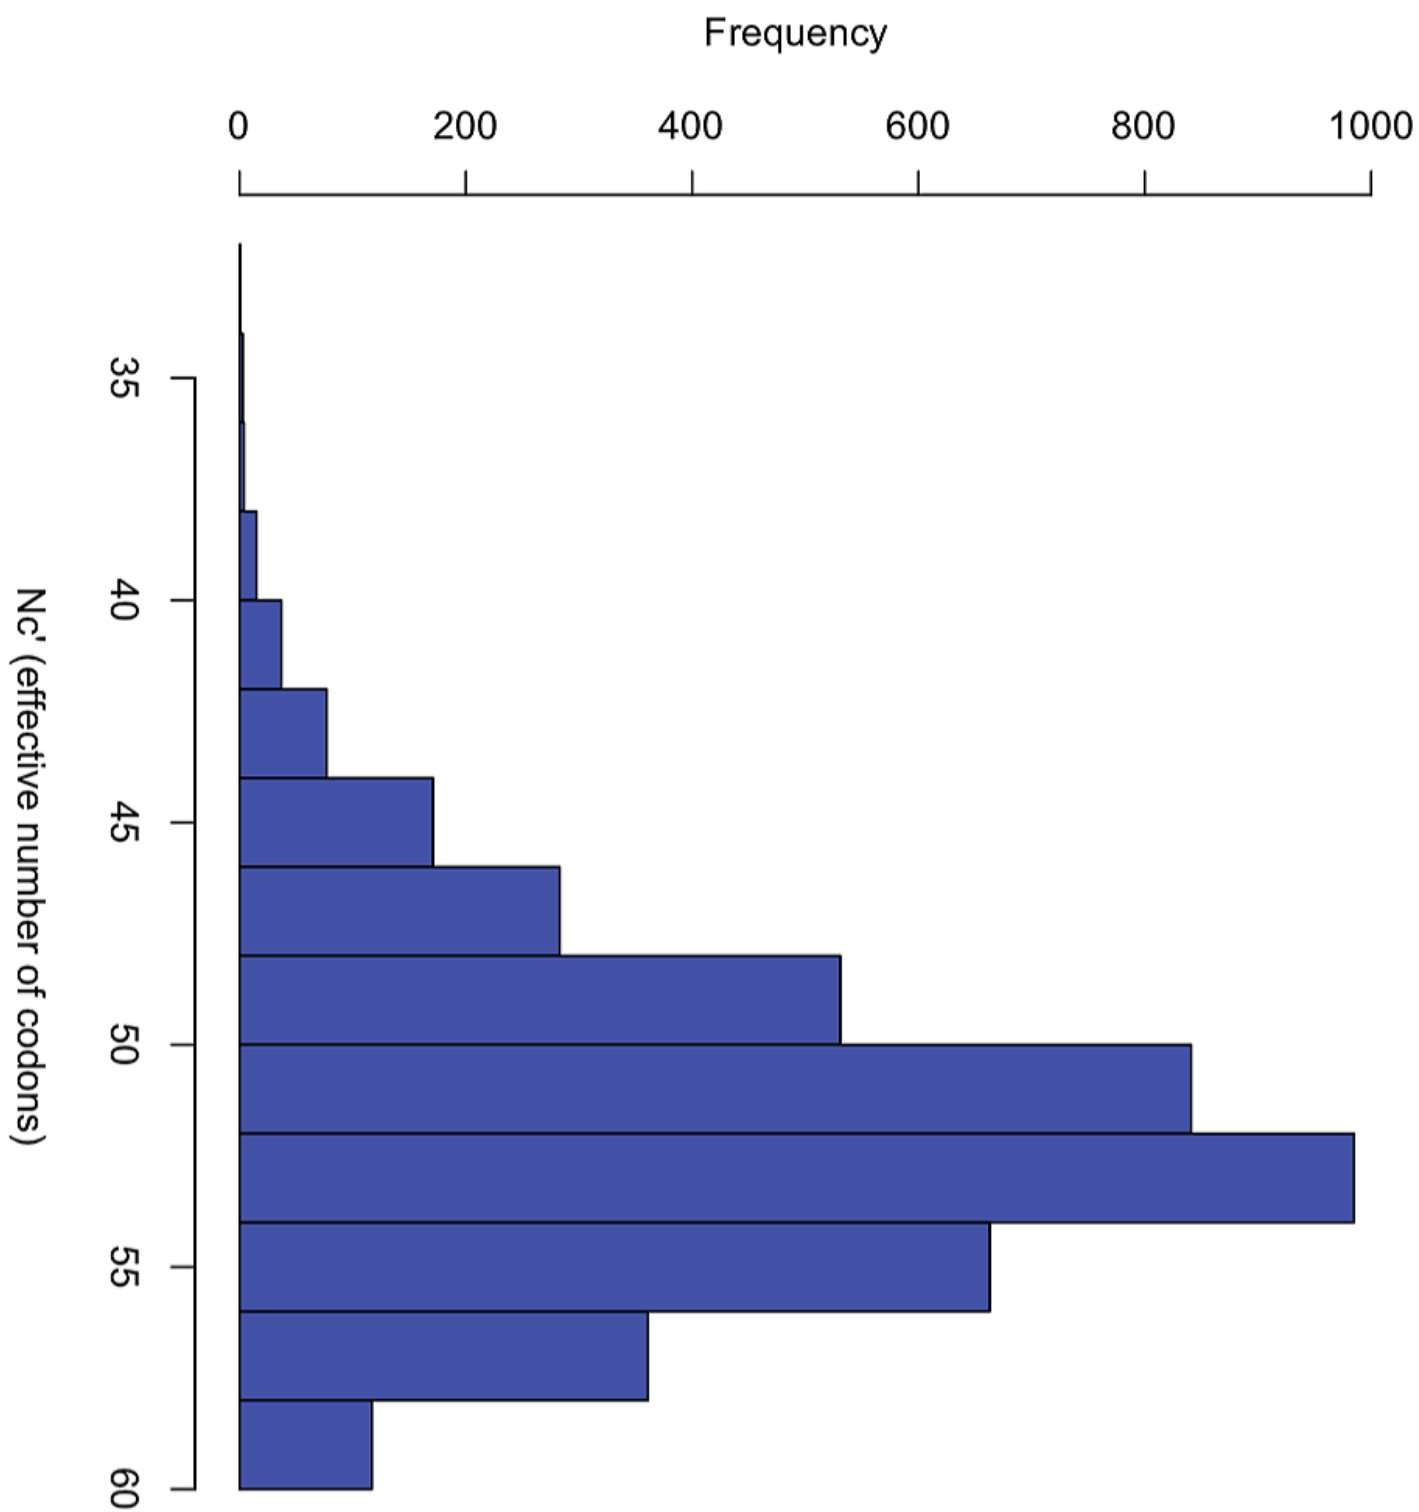

Supplement: supp_evu267_Figures_S4.pdf [file supp_evu267_Figures_S4.pdf]
